# Supplementary material for: Two (5,5)-connected isomeric frameworks as highly selective and sensitive photoluminescent probes of nitroaromatics
Source: Royal Society of Chemistry journal article supplement (doi:10.1039/c7ce00236j), 2017-01-01
Supplement: c7ce00236j1.pdf [file c7ce00236j1.pdf]

## Supporting Information

### Two (5, 5)-connected isomeric frameworks as highly selective and sensitive photoluminescent probes of nitroaromatics

Yue Dai,<sup>a</sup> Huajun Zhou,<sup>b</sup> Xue-Dan Song,<sup>a</sup> Jian-Jun Zhang,<sup>a\*</sup> Ce Hao,<sup>a</sup> Ling Di,<sup>a</sup> Yu-Xian Wang,<sup>a</sup> Jun Ni,<sup>a</sup> Hui-Long Wang<sup>a\*</sup>

<sup>a</sup>Chemistry College, Dalian University of Technology, Dalian 116024, China

<sup>b</sup>High Density Electronics Center, University of Arkansas, Fayetteville, Arkansas 72701, USA

**Table S1.** Selected bond lengths (Å) and angles (°) for complex 1.

|                     |            |                      |            |
|---------------------|------------|----------------------|------------|
| Zn(1)-O(9)#1        | 1.927(4)   | Zn(2)-O(2)#4         | 2.484(4)   |
| Zn(1)-O(5)#2        | 1.930(4)   | O(1)-Zn(2)#4         | 1.990(4)   |
| Zn(1)-O(8)          | 1.989(3)   | O(2)-Zn(2)#4         | 2.484(4)   |
| Zn(1)-O(11)         | 2.132(6)   | O(3)-Zn(2)#5         | 1.996(3)   |
| Zn(1)-O(4)#3        | 2.163(4)   | O(4)-Zn(1)#5         | 2.163(4)   |
| Zn(2)-O(7)          | 1.981(4)   | O(5)-Zn(1)#2         | 1.930(4)   |
| Zn(2)-O(1)#4        | 1.990(4)   | O(9)-Zn(1)#6         | 1.927(4)   |
| Zn(2)-O(3)#3        | 1.996(3)   | O(10)-Zn(2)#6        | 2.001(4)   |
| Zn(2)-O(10)#1       | 2.001(4)   |                      |            |
| O(9)#1-Zn(1)-O(5)#2 | 140.69(19) | O(7)-Zn(2)-O(1)#4    | 111.00(19) |
| O(9)#1-Zn(1)-O(8)   | 108.91(18) | O(7)-Zn(2)-O(3)#3    | 100.71(17) |
| O(5)#2-Zn(1)-O(8)   | 110.34(16) | O(1)#4-Zn(2)-O(3)#3  | 96.32(15)  |
| O(9)#1-Zn(1)-O(11)  | 85.7(3)    | O(7)-Zn(2)-O(10)#1   | 136.49(17) |
| O(5)#2-Zn(1)-O(11)  | 89.9(2)    | O(1)#4-Zn(2)-O(10)#1 | 105.66(19) |
| O(8)-Zn(1)-O(11)    | 93.6(2)    | O(3)#3-Zn(2)-O(10)#1 | 97.66(18)  |
| O(9)#1-Zn(1)-O(4)#3 | 88.6(3)    | O(7)-Zn(2)-O(2)#4    | 91.25(16)  |
| O(5)#2-Zn(1)-O(4)#3 | 93.87(17)  | O(1)#4-Zn(2)-O(2)#4  | 56.53(15)  |
| O(8)-Zn(1)-O(4)#3   | 89.29(16)  | O(3)#3-Zn(2)-O(2)#4  | 152.84(13) |
| O(11)-Zn(1)-O(4)#3  | 174.1(3)   | O(10)#1-Zn(2)-O(2)#4 | 89.90(17)  |

Symmetry transformations used to generate equivalent atoms. #1 = -x+1/2, y-1/2, -z; #2 = -x+1, y, -z+1;

#3 = x, y, z-1; #4 = -x, y, -z; #5 = x, y, z+1; #6 = -x+1/2, y+1/2, -z.

**Table S2.** Selected bond lengths (Å) and angles (°) for complex **2**.

|                      |           |                      |           |
|----------------------|-----------|----------------------|-----------|
| Zn(1)-O(10)#1        | 2.000(11) | Zn(2)-O(6)#4         | 1.923(8)  |
| Zn(1)-O(8)           | 2.017(7)  | Zn(2)-O(7)           | 1.948(5)  |
| Zn(1)-O(11)          | 2.126(9)  | Zn(2)-O(9)#1         | 1.976(10) |
| Zn(1)-O(4)#2         | 2.147(9)  | Zn(2)-O(2)#3         | 2.032(7)  |
| Zn(1)-O(1)#3         | 2.171(11) | Zn(2)-O(1)#3         | 2.352(10) |
| Zn(1)-O(3)#2         | 2.196(10) | O(1)-Zn(2)#5         | 2.352(10) |
| O(1)-Zn(1)#5         | 2.171(10) | O(2)-Zn(2)#5         | 2.032(7)  |
| O(4)-Zn(1)#6         | 2.147(9)  | O(6)-Zn(2)#4         | 1.923(8)  |
| O(3)-Zn(1)#6         | 2.196(10) | O(9)-Zn(2)#7         | 1.976(10) |
| O(10)-Zn(1)#7        | 2.000(11) |                      |           |
| O(10)#1-Zn(1)-O(8)   | 92.1(3)   | O(4)#2-Zn(1)-O(3)#2  | 61.0(3)   |
| O(10)#1-Zn(1)-O(11)  | 91.5(5)   | O(1)#3-Zn(1)-O(3)#2  | 152.9(3)  |
| O(8)-Zn(1)-O(11)     | 175.7(6)  | O(6)#4-Zn(2)-O(9)#1  | 107.1(4)  |
| O(10)#1-Zn(1)-O(4)#2 | 158.3(4)  | O(7)-Zn(2)-O(9)#1    | 104.4(3)  |
| O(8)-Zn(1)-O(4)#2    | 91.4(3)   | O(6)#4-Zn(2)-O(2)#3  | 110.5(3)  |
| O(11)-Zn(1)-O(4)#2   | 86.2(5)   | O(7)-Zn(2)-O(2)#3    | 131.8(3)  |
| O(10)#1-Zn(1)-O(1)#3 | 108.7(4)  | O(9)#1-Zn(2)-O(2)#3  | 107.5(3)  |
| O(8)-Zn(1)-O(1)#3    | 84.1(3)   | O(6)#4-Zn(2)-O(1)#3  | 153.4(4)  |
| O(11)-Zn(1)-O(1)#3   | 92.5(6)   | O(7)-Zn(2)-O(1)#3    | 83.1(3)   |
| O(4)#2-Zn(1)-O(1)#3  | 93.0(4)   | O(9)#1-Zn(2)-O(1)#3  | 99.4(4)   |
| O(10)#1-Zn(1)-O(3)#2 | 97.7(4)   | O(2)#3-Zn(2)-O(1)#3  | 57.0(3)   |
| O(8)-Zn(1)-O(3)#2    | 89.1(3)   | O(6)#4-Zn(2)-O(7)    | 93.0(3)   |
| O(11)-Zn(1)-O(3)#2   | 92.8(5)   | Zn(1)#5-O(1)-Zn(2)#5 | 99.4(4)   |

Symmetry transformations used to generate equivalent atoms. #1= x, -y+1, z+1/2; #2= -x-1/2, y+1/2, -z-1/2; #3 = x+1/2, -y+1/2, z+1/2; #4= -x-1/2, -y+1/2, -z; #5= x-1/2, -y+1/2, z-1/2; #6 = -x-1/2, y-1/2, -z-1/2; #7 = x, -y+1, z-1/2.

**Table S3.** A comparison of calculated CB and VB of complexes **1-2** and reported complexes based on H<sub>5</sub>L<sup>1</sup>.

|                                                                                | CB / eV | VB / eV | Band gap / eV |
|--------------------------------------------------------------------------------|---------|---------|---------------|
| <b>1</b>                                                                       | -0.4018 | -3.6246 | 3.222         |
| <b>2</b>                                                                       | -0.9373 | -2.6112 | 1.673         |
| (Me <sub>2</sub> NH <sub>2</sub> )[Zn <sub>2</sub> L <sup>1</sup> ]·3.5DMF [1] | -1.3026 | -3.9615 | 2.658         |
| [Zn <sub>2</sub> L <sup>1</sup> (H <sub>2</sub> O)]·2DMF·8H <sub>2</sub> O [1] | -1.3526 | -4.2597 | 2.907         |

Methods for DFT calculations:

Density-functional theory (DFT) calculations were carried out by using the Vienna ab-initio simulation package (VASP) code.<sup>[2-3]</sup> The electron-ion interactions was described by Projector-augmented wave (PAW) potentials,<sup>[4]</sup>

and the exchange correlation term was treated within the Local density approximation (LDA).<sup>[5]</sup> All calculations were made with plane-wave cutoff of 520 eV. The convergences of energy and force were set to  $1 \times 10^{-4}$  eV and 0.05 eV/Å, respectively.

**References:**

- [1] L. Di, J.-J. Zhang, S.-Q. Liu, J. Ni, H. Zhou, Y.-J. Sun. *Cryst. Growth Des.* 16 (2016), 4539–4546.
- [2] G. Kresse, J. Furthmüller, *Phys. Rev. B* 54 (1996) 11169–11186.
- [3] G. Kresse, J. Furthmüller, *Comput. Mater. Sci.* 6 (1996) 15–50.
- [4] G. Kresse and D. Joubert, *Phys. Rev. B* 59, 1758 (1999).
- [5] J. P. Perdew, *Electronic Structure of Solids* (Akademie Verlag, Berlin, 1991).

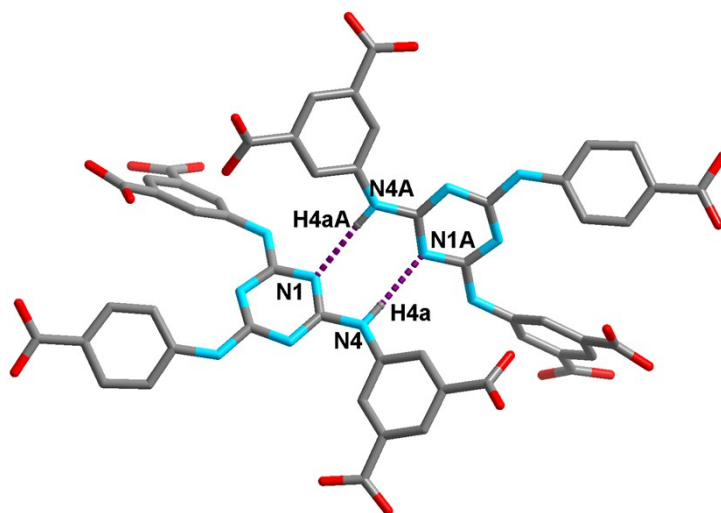

**Fig. S1** The hydrogen bonds (represented as dotted line) between neighboring ligands in **1**. Symmetry codes:  $A = 1 - x, y, 1 - z$ . ( $N4 \cdots N1A = 3.038 \text{ \AA}$ ,  $\angle N4-H4a \cdots N1A = 177.08^\circ$ )

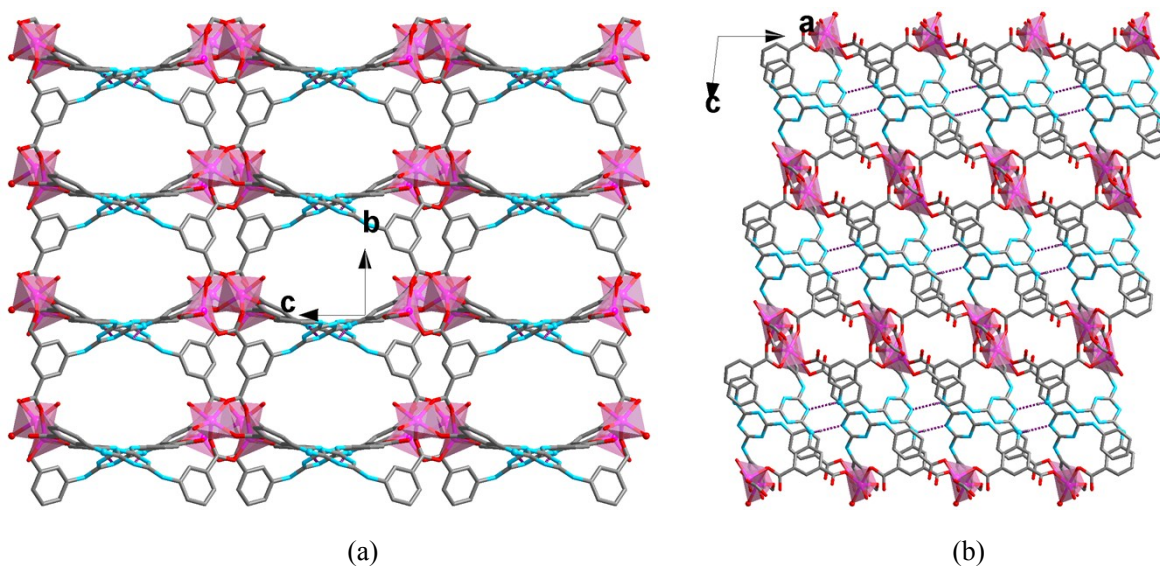

**Fig. S2** The 3D framework of **1** viewed along the *a* direction (a) and *b* direction (b).

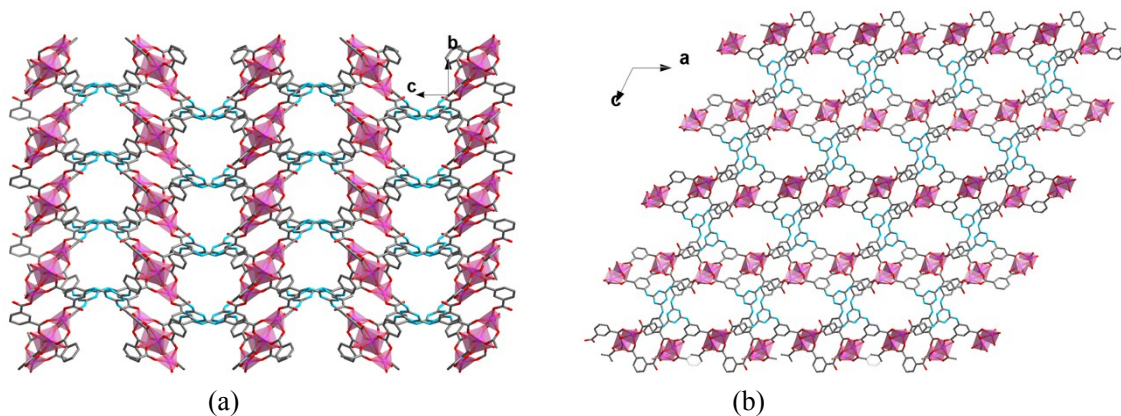

**Fig. S3** The 3D framework of **2** viewed along the *b* axis (a) and *c* axis (b).

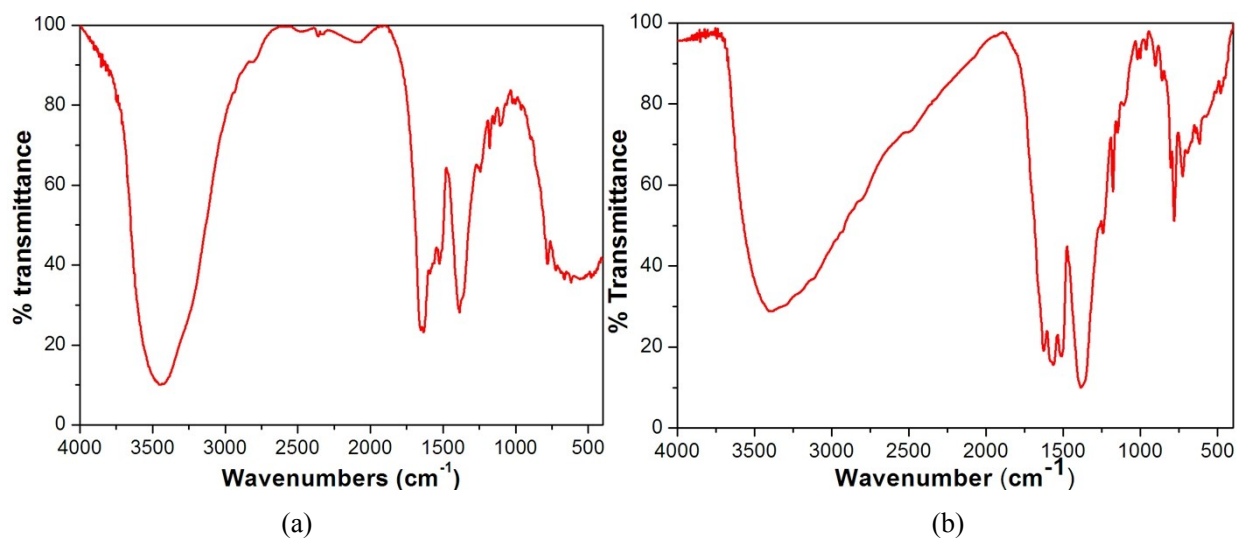

Fig. S4 IR spectrum of the compound 1 (a) and 2 (b).

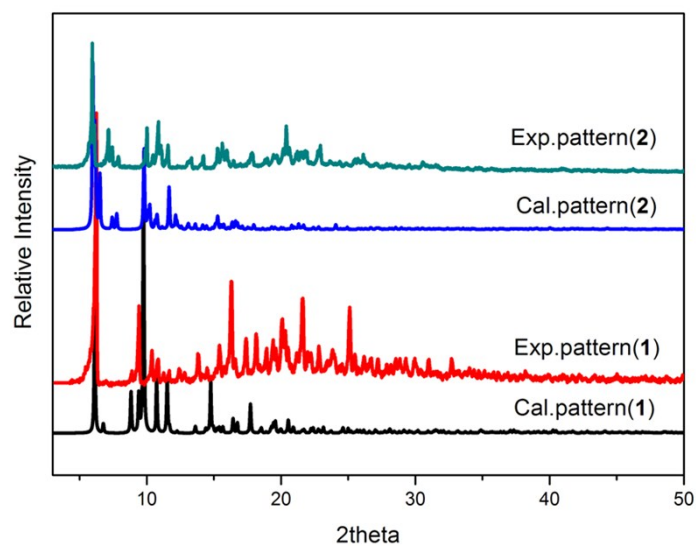

Fig. S5 PXRD patterns of 1-2.

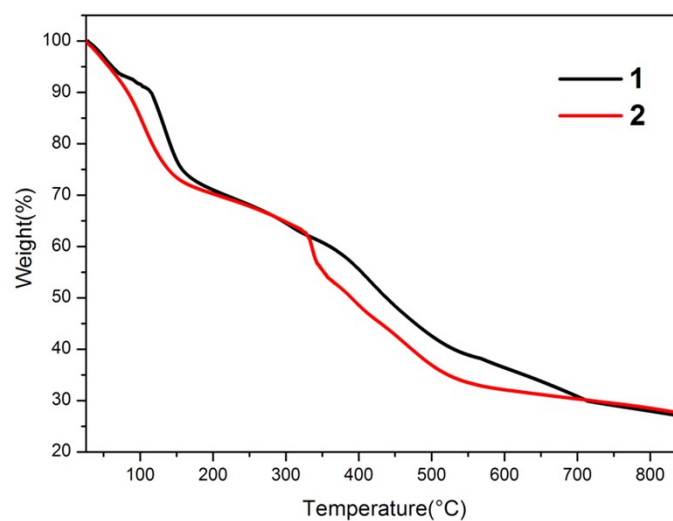

Fig. S6 TGA curves of 1-2.

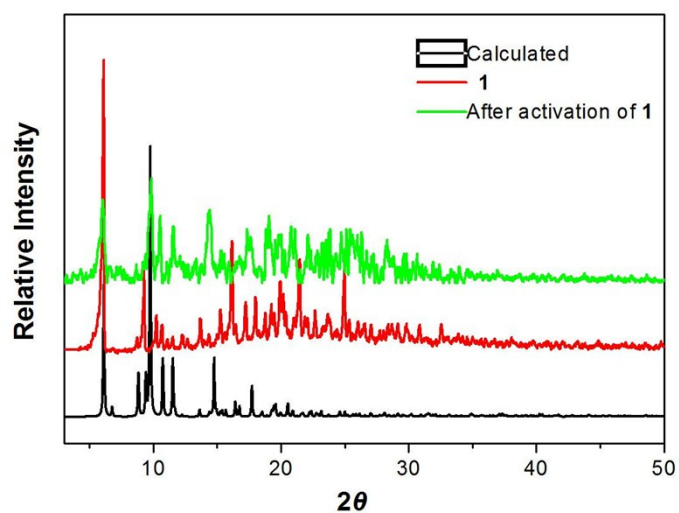

Fig. S7 PXRD patterns of **1** and after activation of **1**.

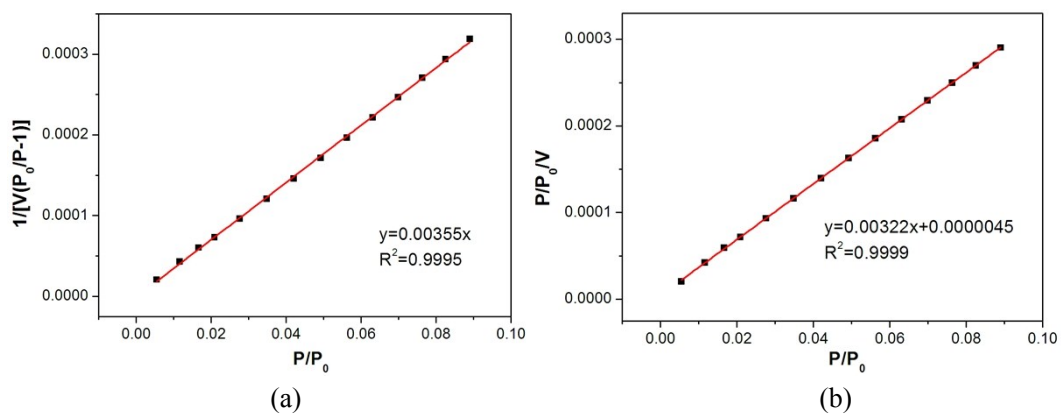

Fig. S8 Langmuir plot (a) and BET plot (b) of the N<sub>2</sub> isotherm for **1** collected at 77 K.

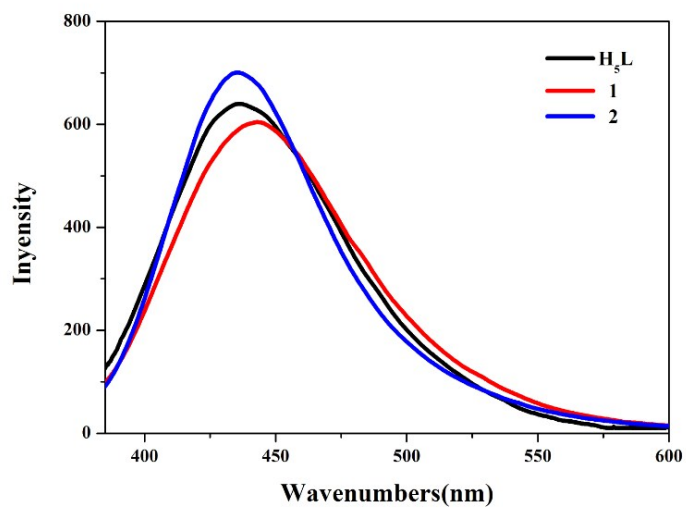

Fig. S9 Solid state PL spectra of ligand H<sub>5</sub>L and compounds **1** and **2**, under  $\lambda_{ex} = 360$  nm.

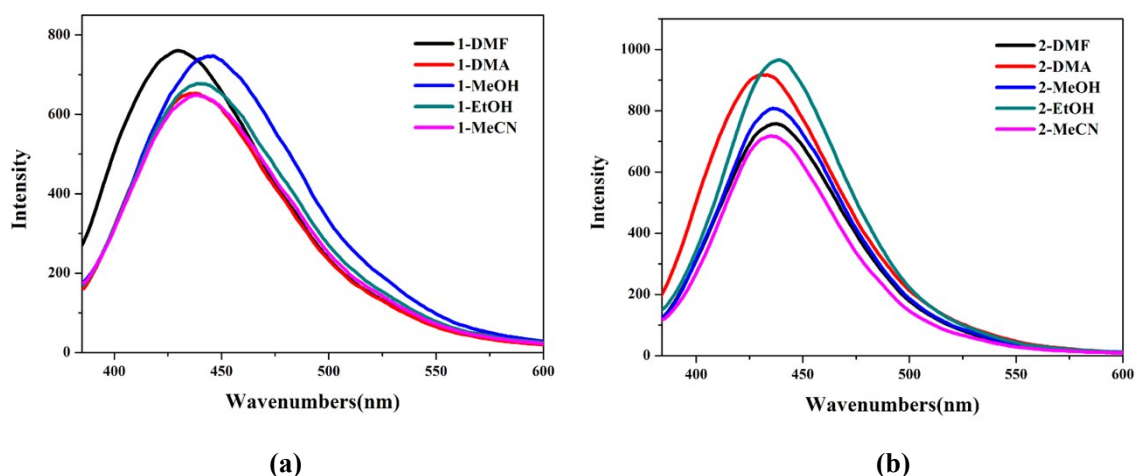

**Fig. S10** PL spectra ( $\lambda_{\text{ex}} = 360$  nm) of suspensions of **1** (a) and **2** (b) dispersed in DMF, DMA, MeOH, EtOH and MeCN.

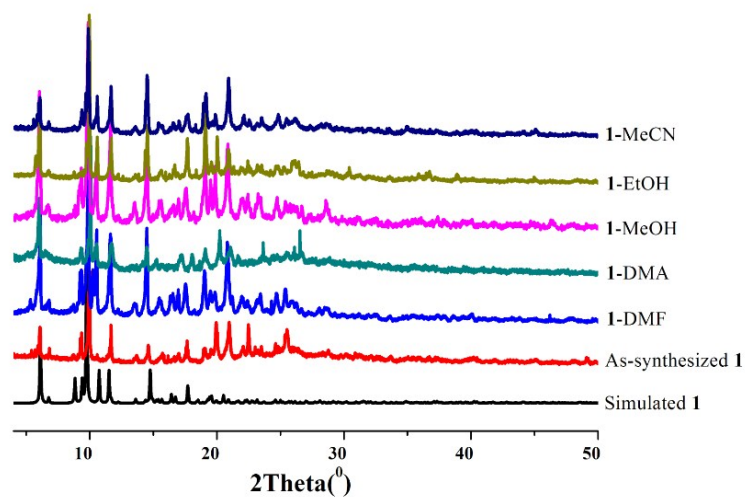

**Fig. S11** A comparison of the powder patterns of **1** and products of **1** soaked in different solvents at room temperature.

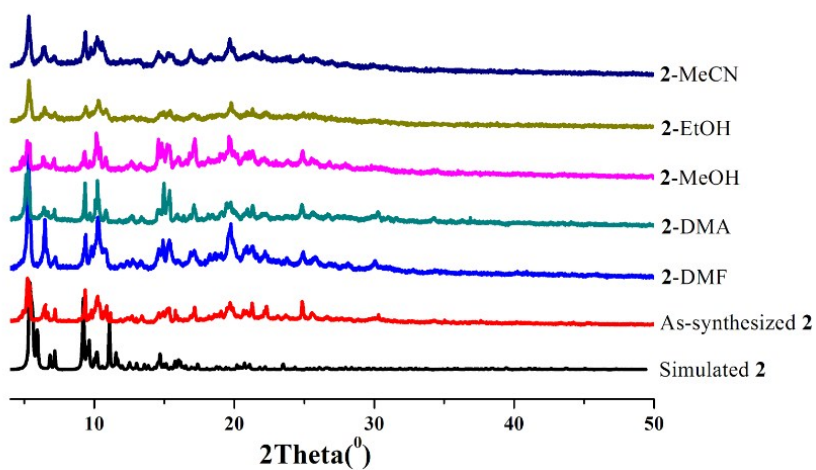

**Fig. S12** A comparison of the powder patterns of **2** and products of **2** soaked in different solvents at room temperature.

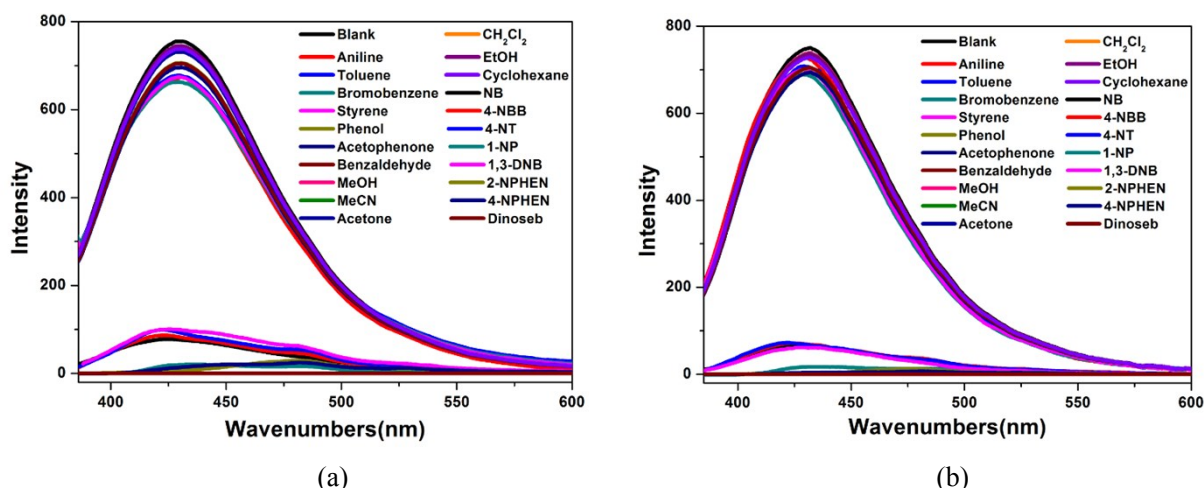

Fig. S13 PL spectra ( $\lambda_{ex} = 360$  nm) of **1**(a) and **2**(b) dispersed in 0.01M DMF solutions of different organics.

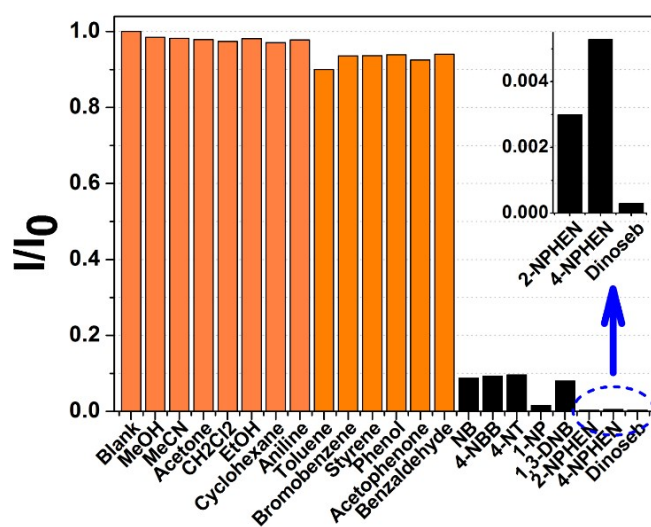

Fig. S14 Fluorescence intensity ratio histograms of suspensions of **2** dispersed in 0.015M DMF solution of different organics.

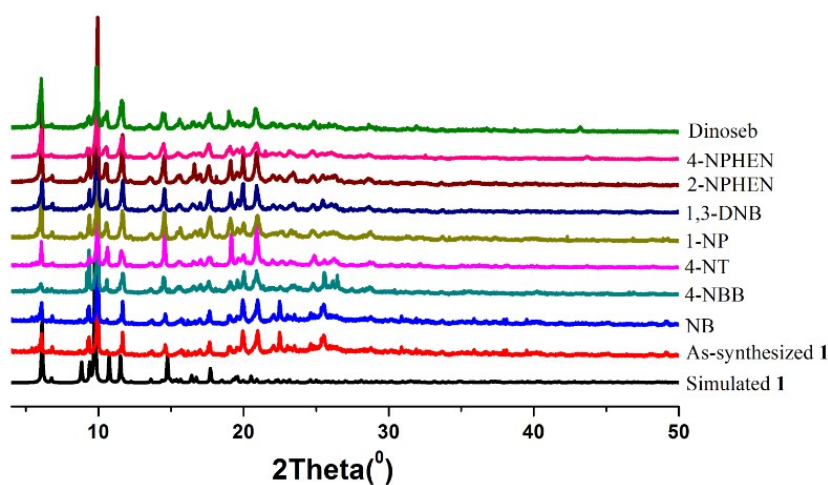

Fig. S15 A comparison of the powder patterns of **1** and products of **1** soaked in DMF solutions containing different NACs at room temperature.



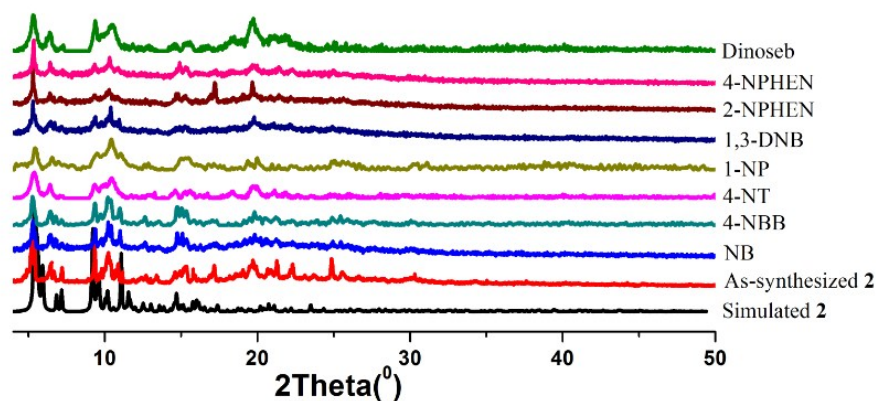

**Fig. S16** A comparison of the powder patterns of **2** and products of **2** soaked in DMF solutions containing different NACs at room temperature.

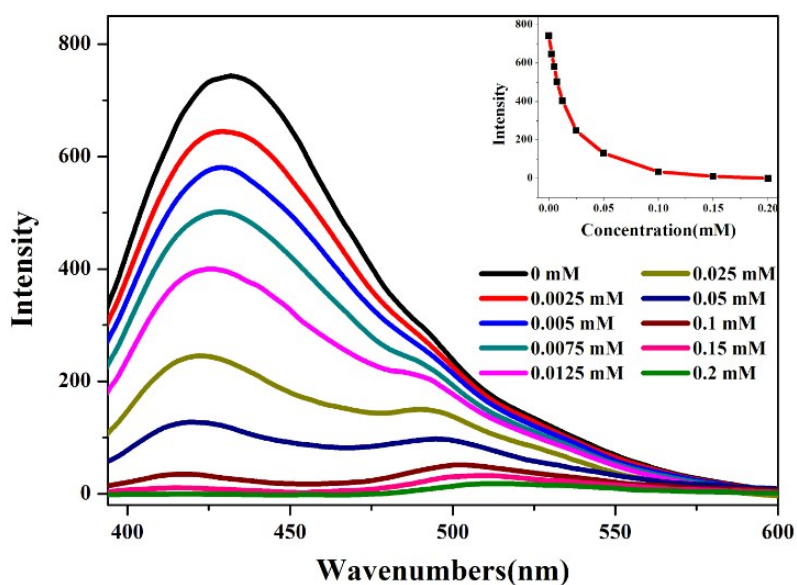

**Fig. S17** PL ( $\lambda_{\text{ex}} = 360$  nm) titration of suspensions of **2** (DMF) by gradual addition of dinoseb (insert shows the PL intensity as a function of dinoseb content).

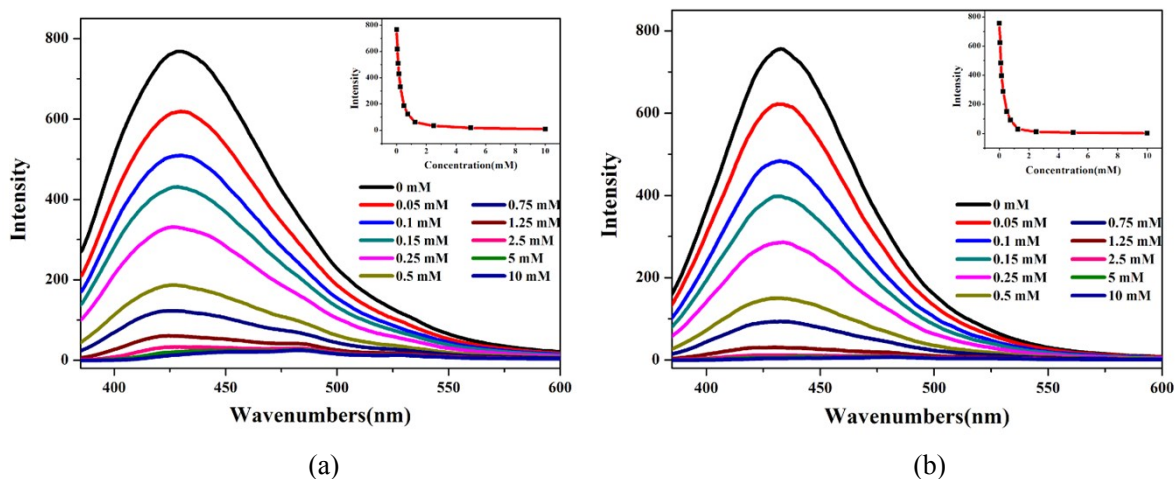

**Fig. S18** PL ( $\lambda_{\text{ex}} = 360$  nm) titration of suspensions of **1** (a) (DMF) and **2** (b) (DMF) by gradual addition of 4-NPPHEN (insert shows the PL intensity as a function of 4-NPPHEN content).

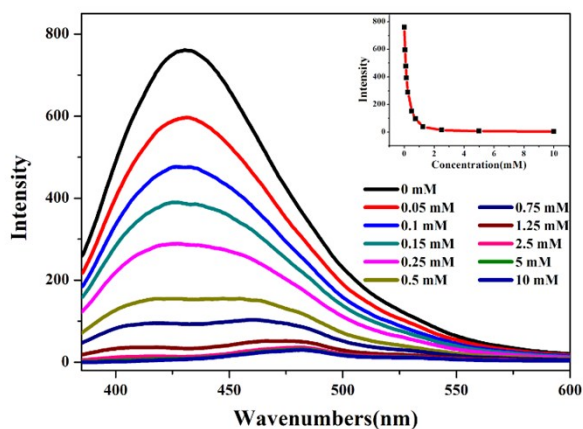

(a)

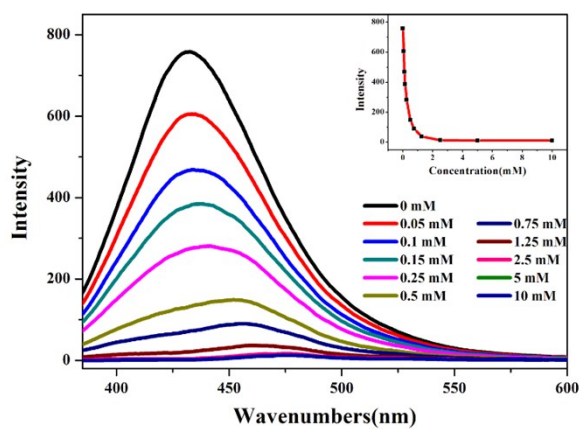

(b)

**Fig. S19** PL ( $\lambda_{\text{ex}} = 360$  nm) titration of suspensions of **1** (a) (DMF) and **2** (b) (DMF) by gradual addition of 2-NPPHEN (insert shows the PL intensity as a function of 2-NPPHEN content).

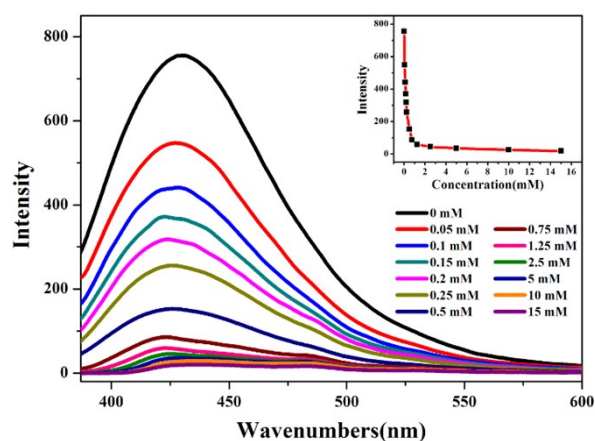

(a)

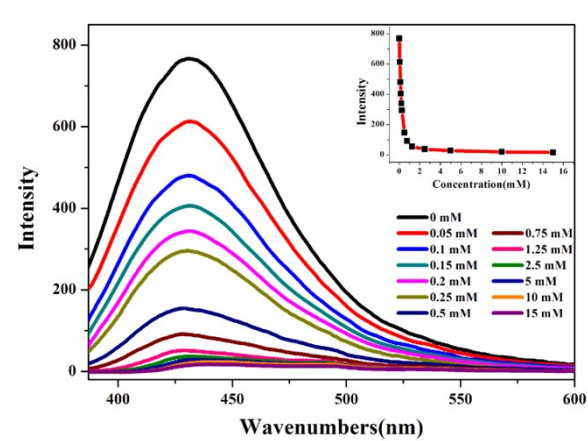

(b)

**Fig. S20** PL ( $\lambda_{\text{ex}} = 360$  nm) titration of suspensions of **1** (a) (DMF) and **2** (b) (DMF) by gradual addition of 1-NP (insert shows the PL intensity as a function of 1-NP content).

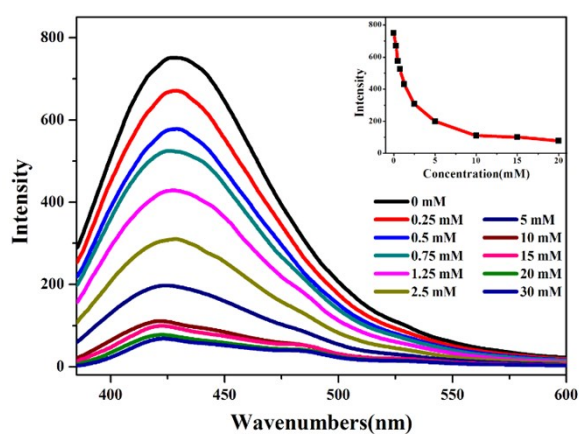

(a)

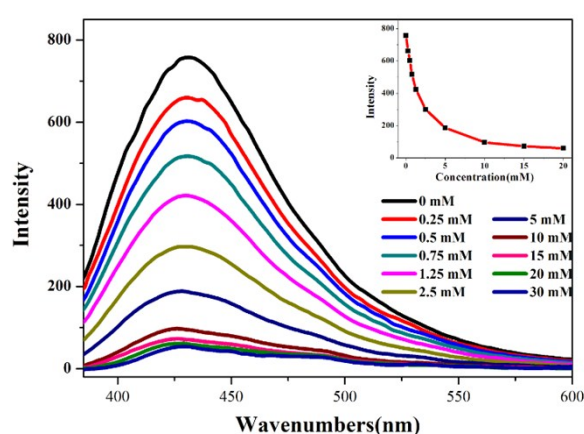

(b)

**Fig. S21** PL ( $\lambda_{\text{ex}} = 360$  nm) titration of suspensions of **1** (a) (DMF) and **2** (b) (DMF) by gradual addition of 4-NT (insert shows the PL intensity as a function of 4-NT content).

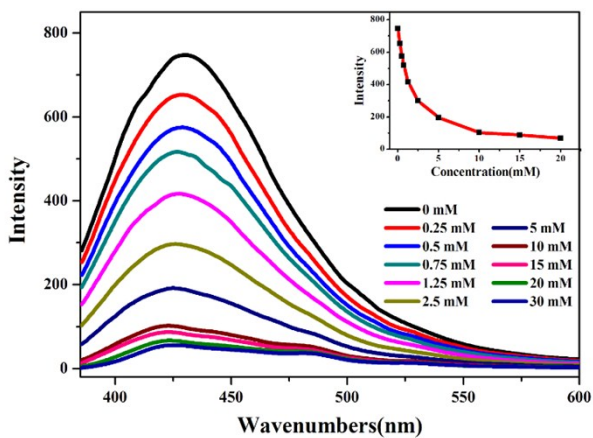

(a)

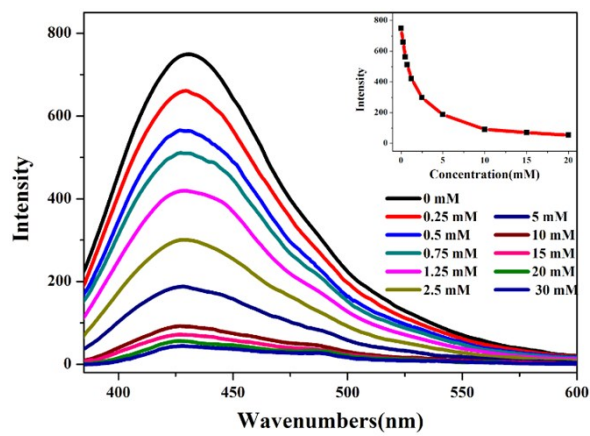

(b)

**Fig. S22** PL ( $\lambda_{\text{ex}} = 360$  nm) titration of suspensions of **1** (a) (DMF) and **2** (b) (DMF) by gradual addition of 4-NBB (insert shows the PL intensity as a function of 4-NBB content).

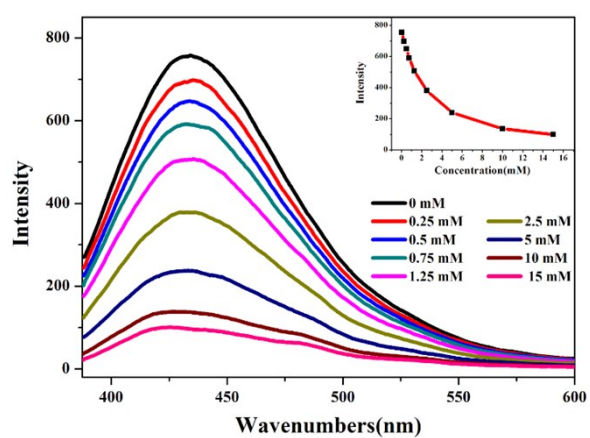

(a)

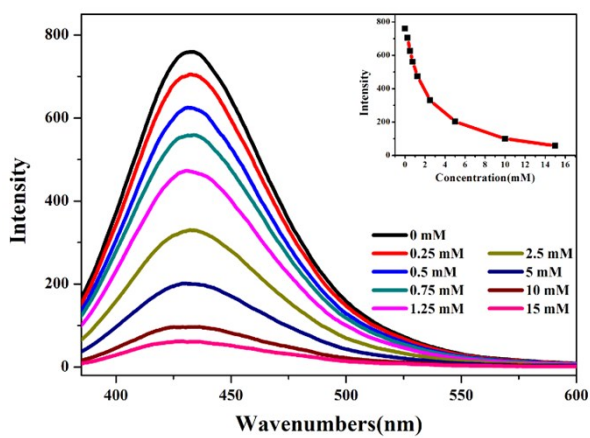

(b)

**Fig. S23** PL ( $\lambda_{\text{ex}} = 360$  nm) titration of suspensions of **1** (a) (DMF) and **2** (b) (DMF) by gradual addition of 1,3-DNB (insert shows the PL intensity as a function of 1,3-DNB content).

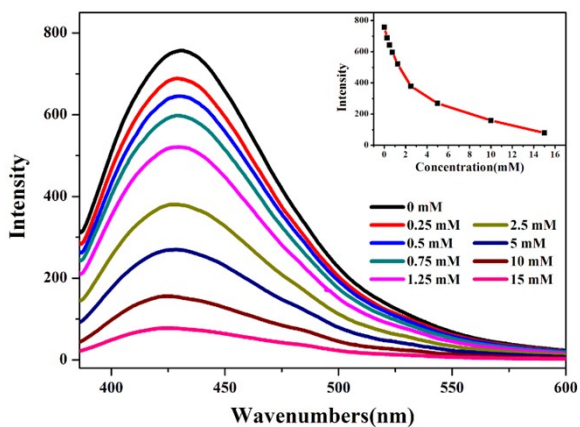

(a)

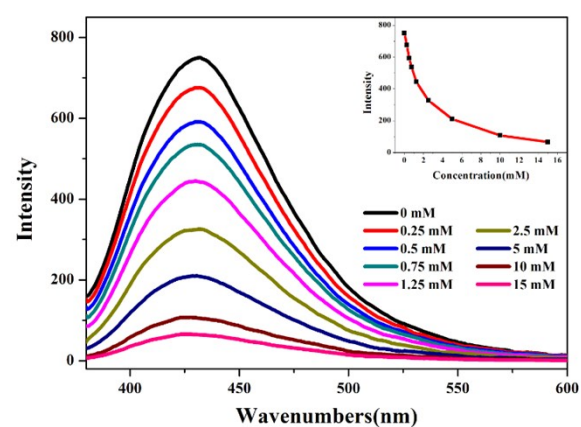

(b)

**Fig. S24** PL ( $\lambda_{\text{ex}} = 360$  nm) titration of suspensions of **1** (a) (DMF) and **2** (b) (DMF) by gradual addition of NB (insert shows the PL intensity as a function of NB content).

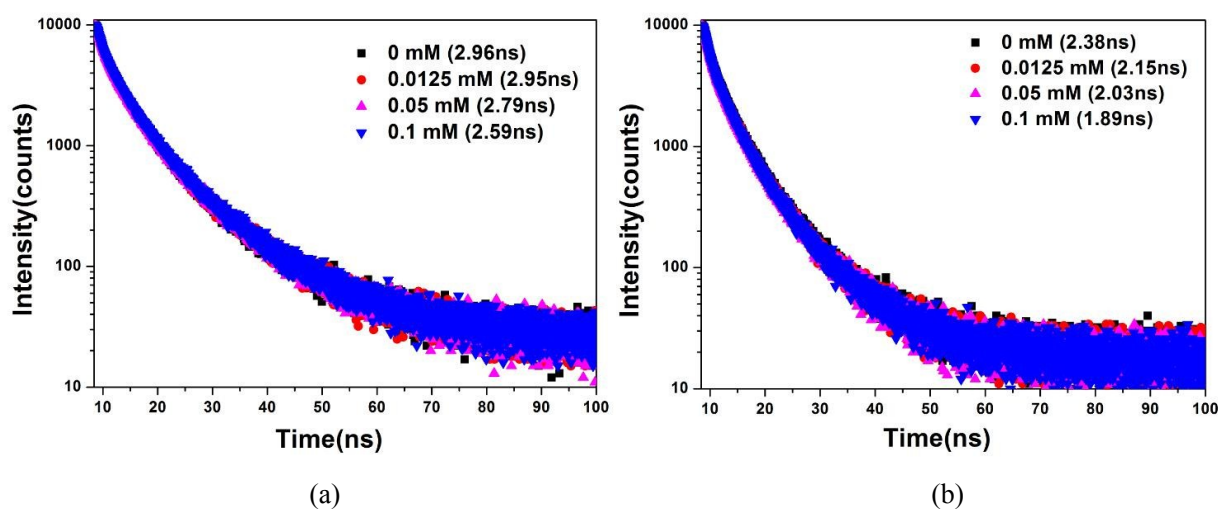

Fig. S25 Emission decay curves and lifetime of **1** (a) and **2** (b) in DMF suspension upon an incremental addition of dinoseb at room temperature.

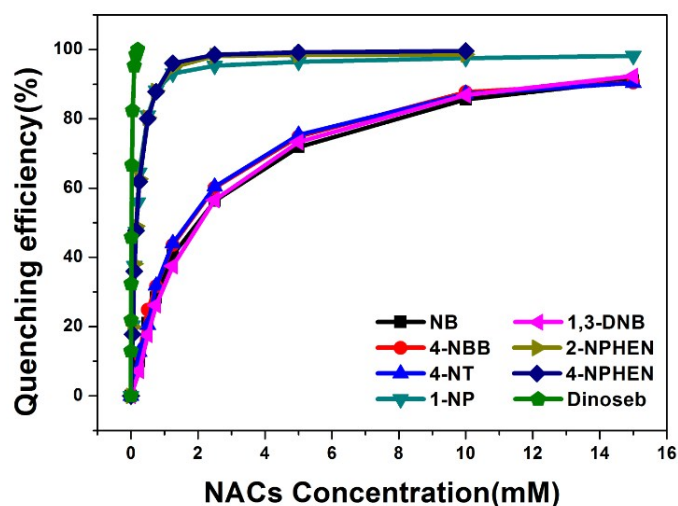

Fig. S26 Plot of quenching efficiency of **2** (a) dispersed in DMF upon incremental addition of different NACs.

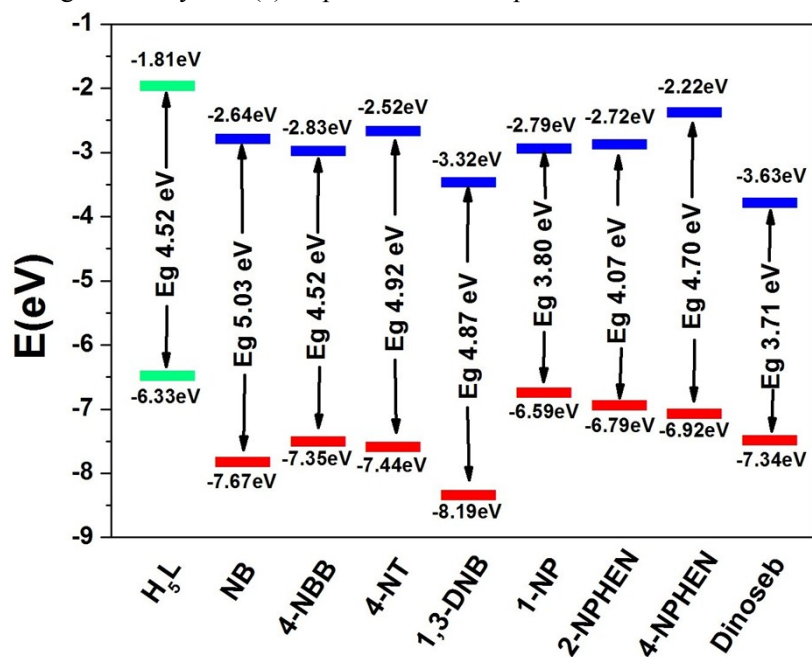

Fig. S27 The HOMO and LUMO energy levels for all the NACs and H<sub>5</sub>L.

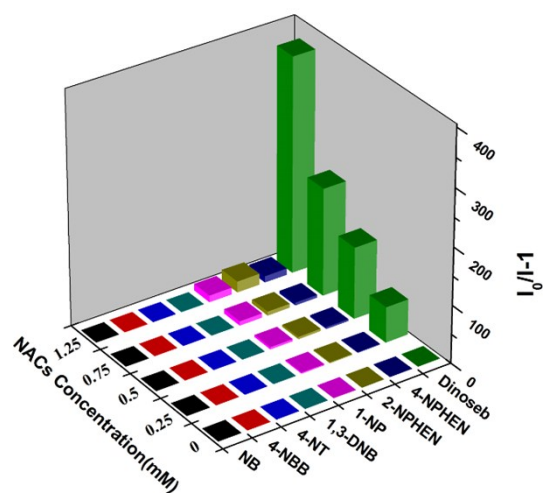

(a)

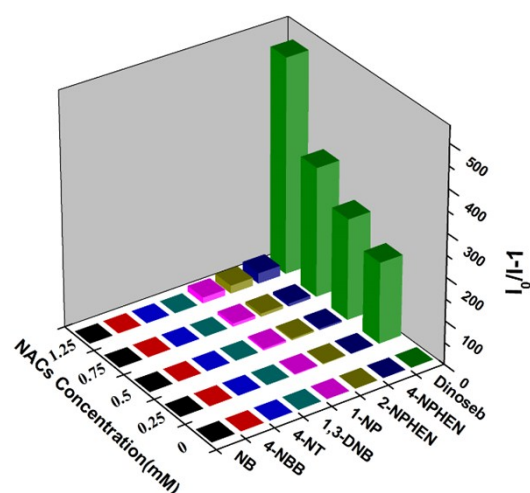

(b)

**Fig. S28** The Stern-Volmer Plots of **1** (a) and **2** (b) dispersed in DMF upon incremental addition of different NACs.

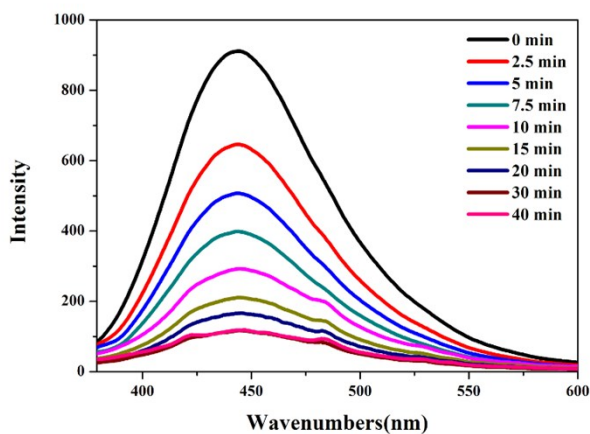

(a)

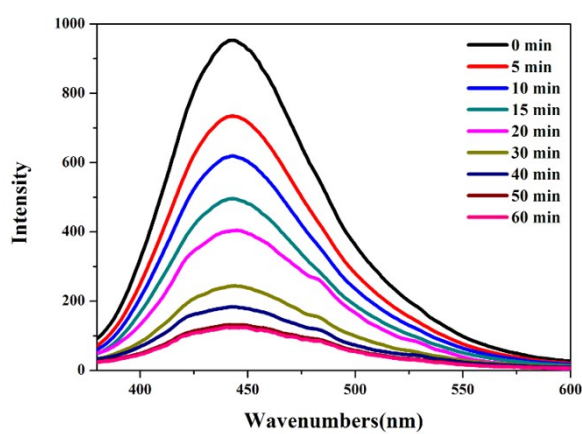

(b)

**Fig. S29** Time dependent fluorescence spectra of solid sample of **1** upon exposure to (a) NB and (b) 4-NT vapor.

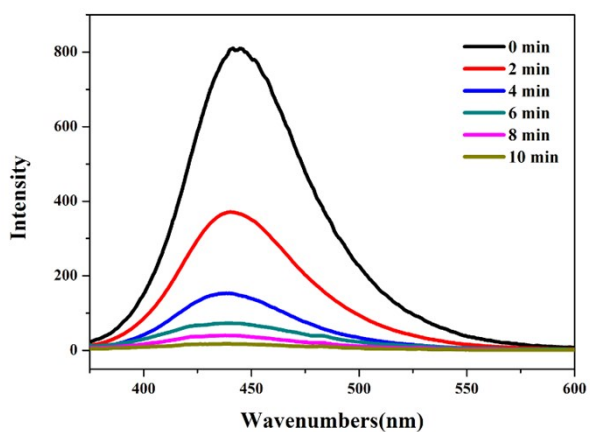

(a)

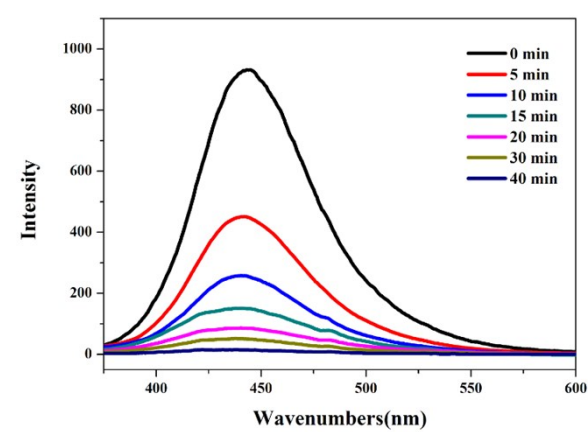

(b)

**Fig. S30** Time dependent fluorescence spectra of solid sample of **2** upon exposure to (a) NB and (b) 4-NT vapor.
